# Supplementary material
Source: PubMed Central journal article supplement (PMC8853645)
Supplement: NIHMS1688614-supplement-Supplemental_Data_1.pdf [file NIHMS1688614-supplement-Supplemental_Data_1.pdf]

# Supplemental Information

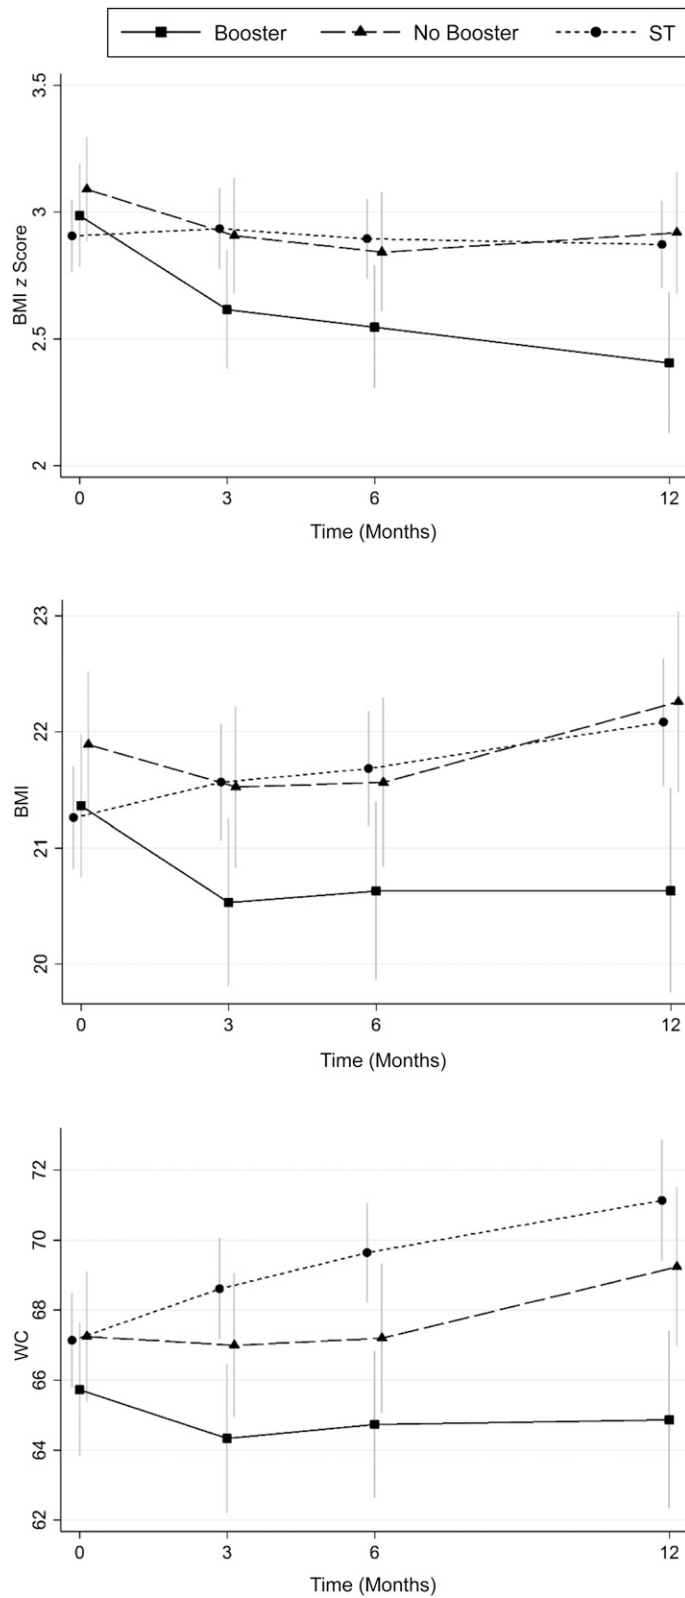

**SUPPLEMENTAL FIGURE 4**

Sensitivity analysis with linear mixed models with time as a factor, not assuming a linear trend. Mean difference change over time in BMI z score (primary outcome) and BMI and WC (secondary outcomes) comparing the parent-only treatment (Booster and No Booster) and ST.

**SUPPLEMENTAL TABLE 3** Content Description of the ML Parent-Only Group Program

| Session | Parenting                                                                                                              | Lifestyle                                                     | Home Practice                                                           |
|---------|------------------------------------------------------------------------------------------------------------------------|---------------------------------------------------------------|-------------------------------------------------------------------------|
| 1       | Welcome and introduction: parents' key roles                                                                           | Obesity treatment of preschoolers                             | Family activity list                                                    |
| 2       | Food and play: when more, when less?                                                                                   | Short cuts to a healthy lifestyle                             | Encouragement profile                                                   |
| 3       | Cooperation: what does it mean, why is it important, and how do we encourage it?                                       | Portion size and energy balance                               | My child's strengths                                                    |
| 4       | Parents as teachers: teaching new behaviors                                                                            | —                                                             | Behaviors to encourage the child to do. Food diary                      |
| 5       | Charts and incentives: a fun way to involve the child in the process of learning new behaviors                         | —                                                             | Introducing the chart to the child and trying it at home                |
| 6       | Preteaching and planning: preparing the child for difficult situations to reduce conflicts                             | Food labeling and nutrient content                            | Situations to prepare the child for                                     |
| 7       | Limit-setting strategies: why is it important and what works?                                                          | The plate model                                               | Limit-setting strategies                                                |
| 8       | Power struggles: how to avoid and get out of power struggles with the child                                            | How to improve your recipes                                   | Getting out of power struggles                                          |
| 9       | More support, less stress: how to get support from other people in the child's network and strategies to reduce stress | What is a healthy snack meal? How to make better food choices | Persons to involve supporting a healthy lifestyle and stress management |
| 10      | Summary: parenting and balancing food and play; summarizing improvements made during the program                       | —                                                             | —                                                                       |

—, not applicable.

**SUPPLEMENTAL TABLE 4** Observed Mean Changes From Baseline in Primary and Secondary Outcomes for Parent-Only Treatment and ST

| Group       | Mean (95% CI)            |                          |                          |
|-------------|--------------------------|--------------------------|--------------------------|
|             | 3 Mo                     | 6 Mo                     | 12 Mo                    |
| BMI z score |                          |                          |                          |
| Parent-only | −0.07 (−0.11 to −0.04)** | −0.15 (−0.22 to −0.07)** | −0.30 (−0.45 to −0.15)** |
| ST          | −0.02 (−0.05 to 0.01)    | −0.03 (−0.09 to 0.03)    | −0.07 (−0.19 to 0.05)    |
| BMI         |                          |                          |                          |
| Parent-only | 0.01 (−0.11 to 0.13)     | 0.02 (−0.22 to 0.26)     | 0.04 (−0.44 to 0.52)     |
| ST          | 0.18 (0.09 to 0.28)**    | 0.37 (0.18 to 0.56)**    | 0.74 (0.36 to 1.12)**    |
| WC          |                          |                          |                          |
| Parent-only | 0.26 (−0.09 to 0.61)     | 0.52 (−0.18 to 1.21)     | 1.04 (−0.36 to 2.43)     |
| ST          | 0.91 (0.60 to 1.23)**    | 1.82 (1.19 to 2.45)**    | 3.64 (2.38 to 4.91)**    |

Parent-only treatment (with and without booster sessions between 3 and 12 months follow-up).

\*\*  $P < .001$ .

**SUPPLEMENTAL TABLE 5** Main Effects of Treatment Group by Time on Primary and Secondary Outcomes for Parent-Only Treatment and ST

|             | Intercept <sup>a</sup> (SE) | Group by Time <sup>b</sup> (95% CI) | $P^c$ | Time <sup>d</sup> |
|-------------|-----------------------------|-------------------------------------|-------|-------------------|
| BMI z score | 2.93 (0.05)                 | −0.02 (−0.03 to −0.003)             | .02   | −0.006            |
| BMI         | 21.30 (0.15)                | −0.06 (−0.11 to −0.003)             | .04   | −0.06             |
| WC (cm)     | 66.70 (0.45)                | −0.22 (−0.38 to −0.06)              | .008  | 0.30              |

<sup>a</sup> Intercept (predicted value at baseline for ST).

<sup>b</sup> Interaction between group and time (months).

<sup>c</sup> The  $P$  value for difference between the groups (group by time interaction).

<sup>d</sup> Coefficient for time (months) for ST.

**SUPPLEMENTAL TABLE 6** Observed Mean Changes From Baseline in Primary and Secondary Outcomes for Booster, No Booster, and ST

| Group              | Mean (95% CI)            |                          |                          |
|--------------------|--------------------------|--------------------------|--------------------------|
|                    | 3 Mo                     | 6 Mo                     | 12 Mo                    |
| <b>BMI z score</b> |                          |                          |                          |
| Booster            | -0.13 (-0.19 to -0.08)** | -0.27 (-0.39 to -0.15)** | -0.54 (-0.77 to -0.30)** |
| No Booster         | -0.03 (-0.76 to 0.02)    | -0.06 (-0.15 to 0.04)    | -0.11 (-0.31 to 0.08)    |
| ST                 | -0.01 (-0.04 to 0.02)    | -0.02 (-0.09 to 0.04)    | -0.04 (-0.18 to 0.09)    |
| <b>BMI</b>         |                          |                          |                          |
| Booster            | -0.16 (-0.35 to 0.03)    | -0.32 (-0.70 to 0.06)    | -0.63 (-1.39 to 0.13)    |
| No Booster         | 0.14 (-0.02 to 0.30)     | 0.28 (-0.04 to 0.60)     | 0.56 (-0.08 to 1.20)     |
| ST                 | 0.20 (0.09 to 0.30)      | 0.39 (0.17 to 0.61)      | 0.78 (0.34 to 1.22)      |
| <b>WC (cm)</b>     |                          |                          |                          |
| Booster            | -0.27 (-0.84 to 0.29)    | -0.54 (-1.67 to 0.58)    | -1.09 (-3.35 to 1.17)    |
| No Booster         | 0.53 (0.06 to 1.00)*     | 1.06 (0.12 to 2.01)*     | 2.12 (0.23 to 4.01)*     |
| ST                 | 1.01 (0.66 to 1.37)**    | 2.03 (1.32 to 2.74)**    | 4.06 (2.64 to 5.47)**    |

\*\*  $P < .001$ .\*  $P = .03$ .**SUPPLEMENTAL TABLE 7** The Main Effects of Treatment Group by Time on Primary (BMI z Score) and Secondary (BMI, WC) Outcomes for Booster, No Booster, and ST

|             | Intercept <sup>a</sup> (SE) | Booster by Time <sup>b</sup> (95% CI) | $P^c$ | No Booster by Time <sup>d</sup> (95% CI) | $P^e$ | Time <sup>e</sup> (95% CI) | $P^f$ |
|-------------|-----------------------------|---------------------------------------|-------|------------------------------------------|-------|----------------------------|-------|
| BMI z score | 2.93 (0.05)                 | -0.04 (-0.06 to -0.02)                | .000  | -0.01 (-0.02 to 0.01)                    | .551  | -0.00 (-0.01 to 0.01)      | .520  |
| BMI         | 21.30 (0.15)                | -0.12 (-0.19 to -0.04)                | .002  | -0.02 (-0.08 to 0.04)                    | .569  | 0.07 (0.03 to 0.10)        | .001  |
| WC (cm)     | 66.66 (0.45)                | -0.43 (-0.65 to -0.21)                | .000  | -0.15 (-0.35 to 0.03)                    | .100  | 0.34 (0.22 to 0.46)        | .000  |

<sup>a</sup> Intercept (predicted value at baseline for ST).<sup>b</sup> Interaction between parent-only Booster group and time (months). ST as reference.<sup>c</sup> The  $P$  value for difference between the groups (group by time interaction) with ST as reference group.<sup>d</sup> Interaction between the parent-only No Booster group and time (months). ST as reference.<sup>e</sup> Coefficient for time (months) for ST.<sup>f</sup> The  $P$  value for change from baseline for ST.**SUPPLEMENTAL TABLE 8** Three-Way Interactions Examining the Effects of Sociodemographic Variables on Treatment Results, BMI z Score (Primary Outcome)

|                          | Coefficient |            | 95% CI        |               | $P$     |            |
|--------------------------|-------------|------------|---------------|---------------|---------|------------|
|                          | Booster     | No Booster | Booster       | No Booster    | Booster | No Booster |
| <b>Child</b>             |             |            |               |               |         |            |
| Age                      | -0.005      | -0.002     | -0.03 to 0.02 | -0.03 to 0.02 | .729    | .893       |
| Sex                      | 0.003       | 0.009      | -0.04 to 0.05 | -0.03 to 0.05 | .911    | .645       |
| First born               | -0.008      | -0.009     | 0.05 to 0.04  | -0.05 to 0.03 | .728    | .672       |
| Living with both parents | 0.005       | 0.007      | 0.04 to 0.05  | -0.05 to 0.06 | .830    | .790       |
| <b>Mother</b>            |             |            |               |               |         |            |
| University degree        | -0.030      | -0.014     | -0.07 to 0.01 | -0.05 to 0.02 | .161    | .468       |
| Income                   | 0.002       | -0.009     | -0.02 to 0.03 | -0.03 to 0.01 | .880    | .374       |
| Foreign background       | 0.023       | 0.029      | -0.02 to 0.06 | -0.01 to 0.06 | .253    | .096       |
| BMI                      | 0.001       | 0.000      | -0.00 to 0.00 | -0.00 to 0.00 | .521    | .773       |
| <b>Father</b>            |             |            |               |               |         |            |
| University degree        | -0.024      | 0.004      | -0.07 to 0.02 | -0.04 to 0.05 | .295    | .837       |
| Income                   | -0.003      | 0.000      | -0.02 to 0.02 | -0.02 to 0.02 | .779    | .965       |
| Foreign background       | 0.011       | 0.049      | -0.03 to 0.05 | 0.01 to 0.08  | .548    | .006*      |
| BMI                      | 0.002       | 0.000      | -0.00 to 0.01 | -0.00 to 0.01 | .479    | .885       |

ST and No Booster are used as reference in the regression analyses. A value of  $P < .05$  was regarded as significant.\*  $P < .05$ .

**SUPPLEMENTAL TABLE 9** Sensitivity Analysis Using  $\delta$  Adjustment on Primary Outcome

| $\delta$ | Estimate | 95% CI          |
|----------|----------|-----------------|
| 0        | -0.04    | -0.06 to -0.02* |
| 0.10     | -0.04    | -0.06 to -0.02* |
| 0.20     | -0.03    | -0.06 to -0.02* |
| 0.30     | -0.03    | -0.05 to -0.01* |
| 0.40     | -0.03    | -0.05 to -0.01* |
| 0.50     | -0.03    | -0.05 to -0.00* |
| 0.60     | -0.02    | -0.04 to -0.00* |
| 0.70     | -0.02    | -0.04 to 0.00   |
| 0.80     | -0.02    | -0.04 to 0.01   |
| 0.90     | -0.01    | -0.04 to 0.01   |
| 1.00     | -0.01    | -0.03 to 0.01   |

Sensitivity analysis to investigate the possible effect of MNAR by adding a BMI z score (primary outcome) value to all imputations for the Booster group but not the other 2 groups (No Booster and ST). The effect was no longer significant when a value of 0.7 had been added.

\*  $P < .05$ .
